# Supplementary material for: Direct projection on dry-film photoresist (DP2): do-it-yourself three-dimensional polymer microfluidics
Source: Royal Society of Chemistry journal article supplement (doi:10.1039/b817925e), 2009-01-01
Supplement: b817925e.pdf [file b817925e.pdf]

**Electronic Supplementary Information For**  
**Direct Projection on Dry-film Photoresist (DP2): Do-it-yourself Three-dimensional Polymer Microfluidics**

Siwei Zhao, Hailin Cong and Tingrui Pan

Department of Biomedical Engineering, University of California, Davis, CA 95616

Email: [trpan@ucdavis.edu](mailto:trpan@ucdavis.edu)

**Optimized protocol for exposure and development of 10 $\mu$ m dry-film feature**

The exposure energy measures 61mW/cm<sup>2</sup> at 405nm using a photo-intensity meter (Model 150, ABM Inc.) and the exposure time is 22 seconds. An air-brush (Model 150, Badger Air-brush Co.) is used to spray developer solution onto dry-film photoresist. The air-brush is connected to an Ar tank, and the gas pressure is adjusted to be 132kPa. 0.5% wt. Na<sub>2</sub>CO<sub>3</sub> solution is used as developer as mentioned in the paper. During development, the air-brush is held at a distance of 1.5cm from the dry-film surface and the developer stream is kept perpendicular to the dry-film surface. The sample is developed for 40 seconds, followed by gentle de-ionized water rinse and Ar gas dry.

**Close-up SEM picture of the bonding interface between dry-film layers**

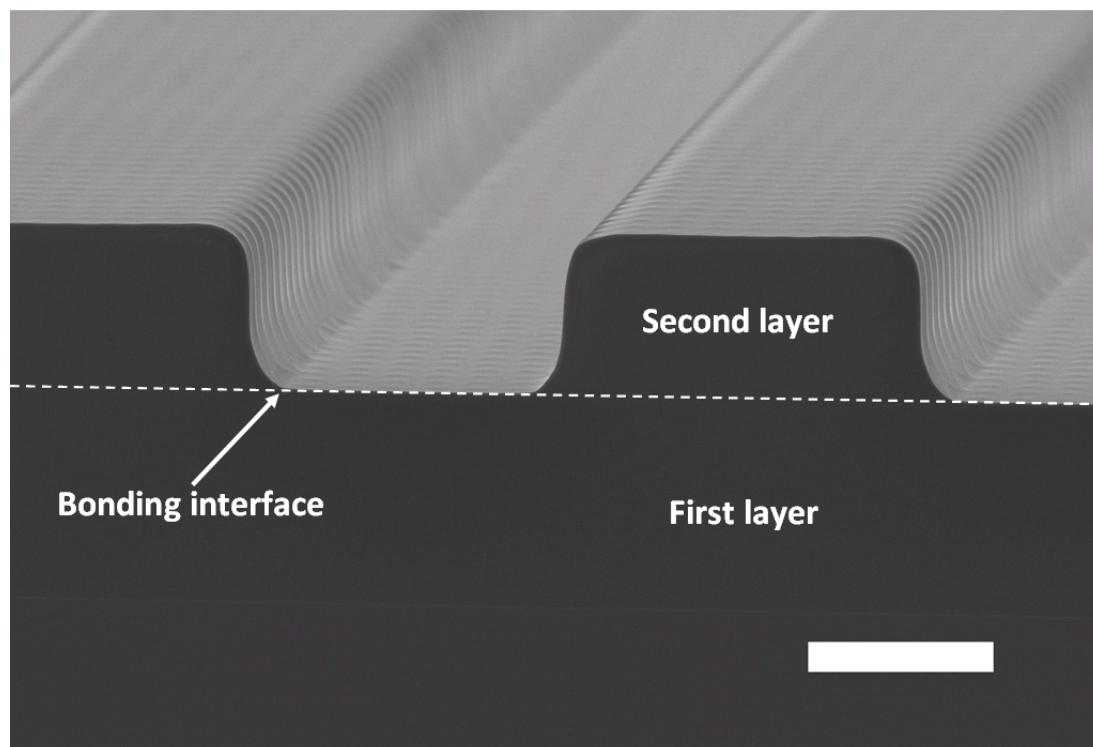

Scale bar shows 100 $\mu$ m
